# Supplementary material for: AI-based analysis of fetal growth restriction in a prospective obstetric cohort quantifies compound risks for perinatal morbidity and mortality and identifies previously unrecognized high risk clinical scenarios
Source: Springer Nature journal article supplement (doi:10.1186/s12884-024-07095-6), 2025-01-29

## SUPPLEMENTAL TABLE AND FIGURES

**Supplementary Table.** PGM variable missingness among analyzed participants (n=9553)

| <b>Variable</b>               | <b>Missing, entire cohort, n(%)</b> | <b>Missing, training subcohort, n(%)</b> | <b>Missing, Validation subcohort, n(%)</b> |
|-------------------------------|-------------------------------------|------------------------------------------|--------------------------------------------|
| Progesterone use              | 92 (1.0)                            | 71 (0.7)                                 | 21 (1.1)                                   |
| V3 EFW                        | 612 (6.4)                           | 481 (5.0)                                | 131 (6.9)                                  |
| 5min Apgar <7                 | 139 (1.5)                           | 139 (1.5)                                | 0 (0)                                      |
| Congenital anomaly            | 83 (0.9)                            | 63 (0.7)                                 | 20 (1)                                     |
| GA at del                     | 84 (0.9)                            | 64 (0.7)                                 | 20 (1)                                     |
| Neonatal sex                  | 104 (1.1)                           | 75 (0.8)                                 | 29 (1.5)                                   |
| PPROM                         | 0 (0)                               | 0 (0)                                    | 0 (0)                                      |
| Pregestational DM             | 88 (0.9)                            | 66 (0.7)                                 | 22 (1.2)                                   |
| UrgCD                         | 0 (0)                               | 0 (0)                                    | 0 (0)                                      |
| V2 high BP                    | 469 (4.9)                           | 366 (3.8)                                | 103 (5.4)                                  |
| HDP                           | 98 (1.0)                            | 75 (0.8)                                 | 23 (1.2)                                   |
| Composite perinatal morbidity | 0 (0)                               | 0 (0)                                    | 0 (0)                                      |

### Supplementary Figure 1.

**Title:** PGM-estimated absolute and relative risks of each PGM variable in the setting of FGR scenario.

**Caption:** The absolute risk (AR) column expresses the risk of composite perinatal morbidity for the given clinical scenario. The relative risk (RR) column expresses the RR of the given scenario when compared to the risk conferred by EFW 3-9<sup>th</sup> (or <3<sup>rd</sup>) percentile alone, as appropriate. N's represent the number of cohort participants in each scenario. The vertical gray line reflects the cohort's background risk of composite perinatal morbidity (8.3%). Diabetes refers to pre-gestational diabetes. In the clinical scenarios, "%" denotes percentile. PGM, probabilistic graphical model; AR, absolute risk (expressed as a percent); SD, standard deviation; EFW, estimated fetal weight; PTB, preterm birth. When used alongside EFWs, % denotes percentile.

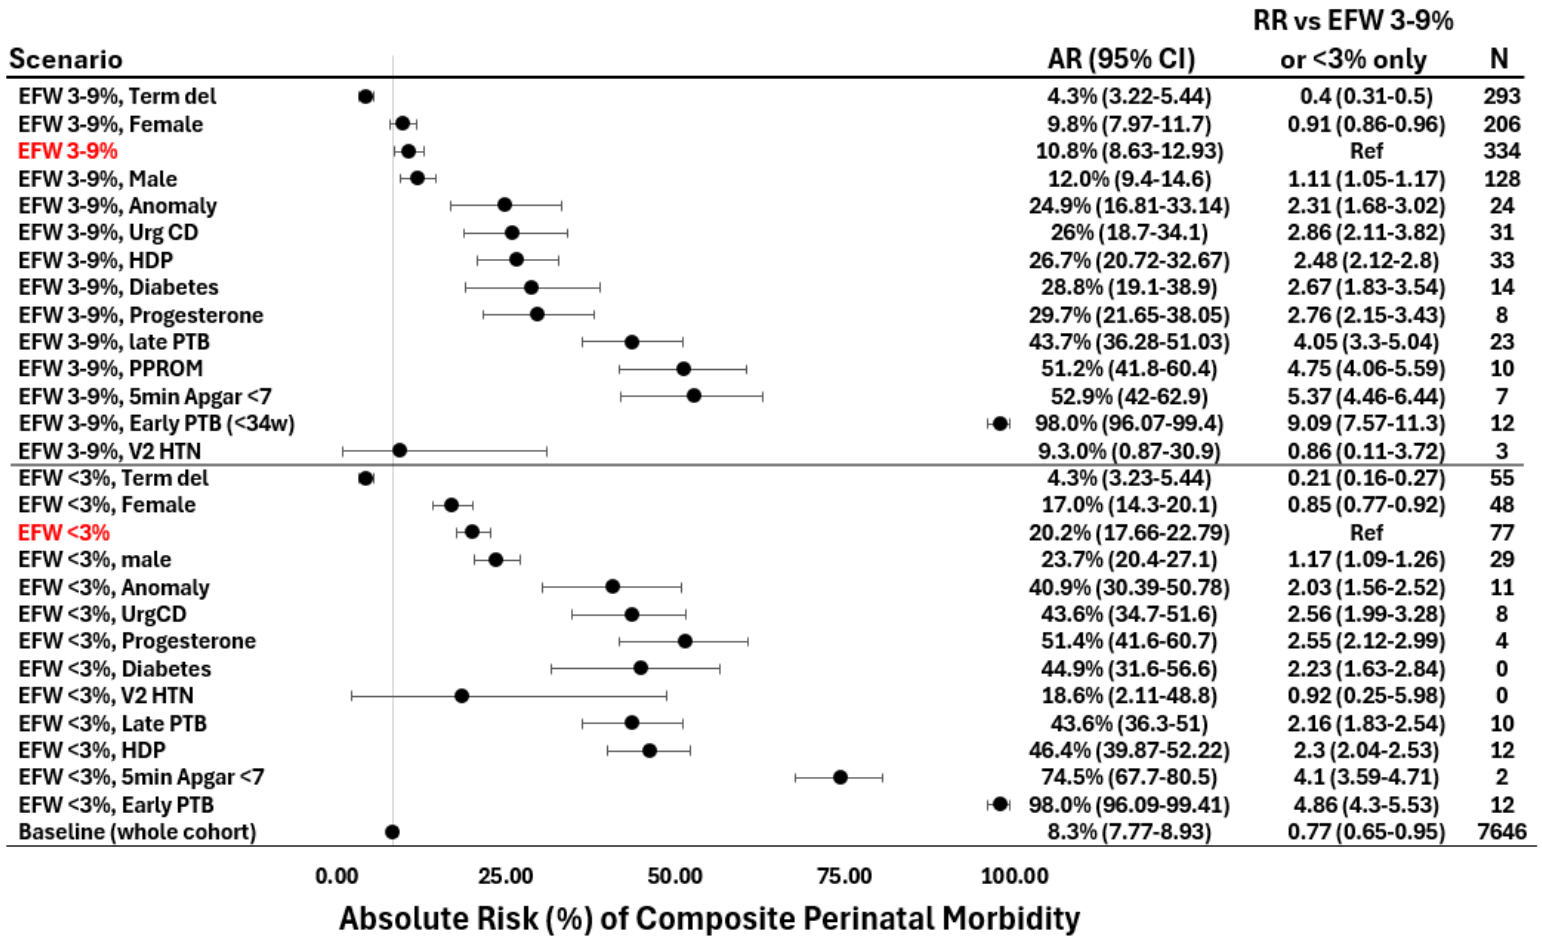

**Supplementary Figure 2.**

**Title:** Association of female fetal sex with composite perinatal morbidity compared to male sex in combination with other variables in the PGM.

**Caption:** The PGM identified scenarios in which female sex was associated with reduced risk (EFW <3<sup>rd</sup> percentile, EFW 3-9<sup>th</sup> percentile, EFW 10-90<sup>th</sup> percentile, progesterone use, HDP), uncertain risk (5 minute Apgar <7, fetal anomaly, high BP 16-21 weeks, EFW >90<sup>th</sup> percentile, urgent cesarean), no difference in risk (early and late PTB), and elevated risk (pre-gestational diabetes), compared to male sex.

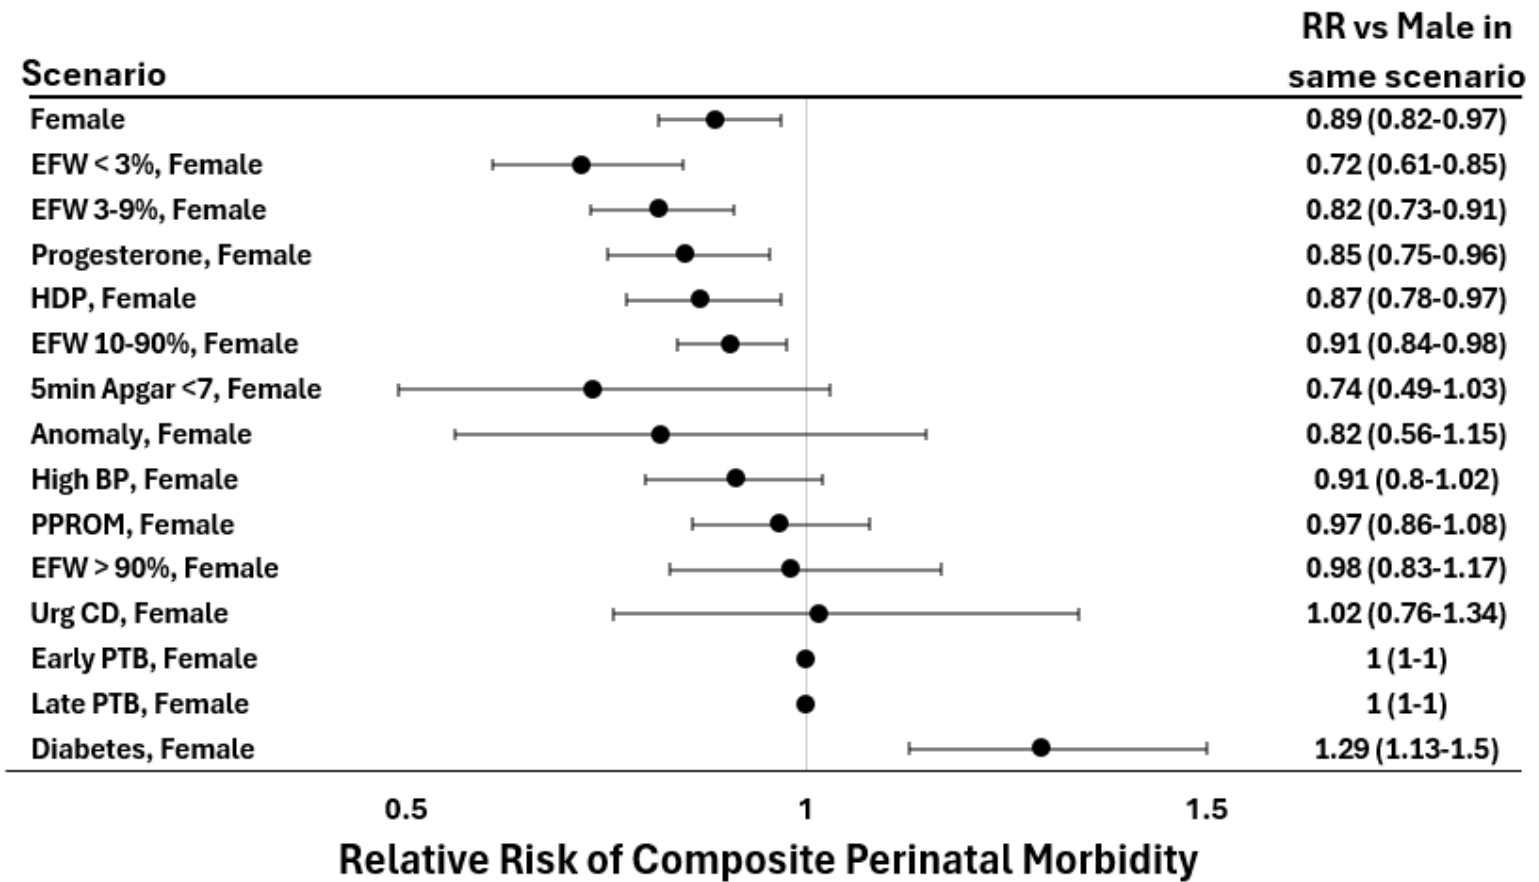

### Supplementary Figure 3.

**Title:** The association of progesterone use with composite perinatal morbidity does not vary according to fetal sex, maternal pregestational diabetes, or EFW percentile category.

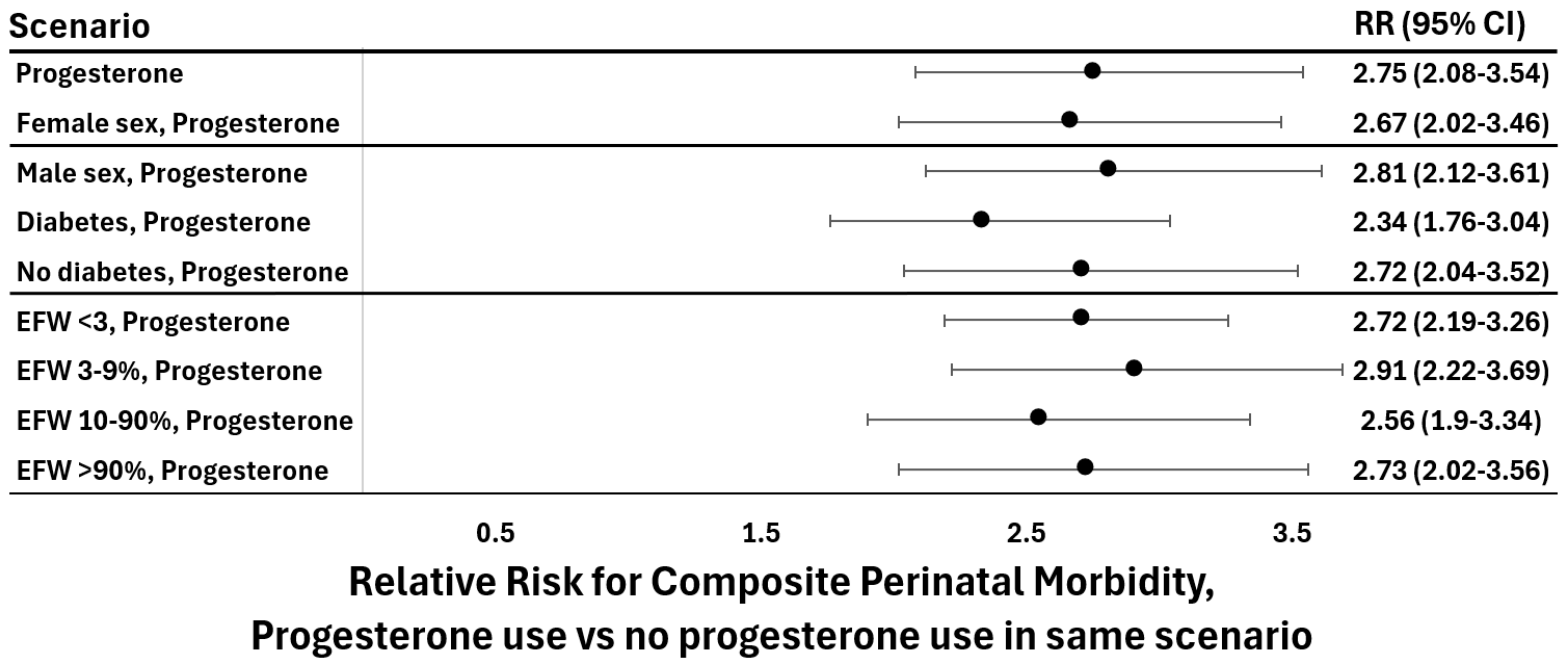

Supplement: 12884_2024_7095_MOESM1_ESM.pdf [file 12884_2024_7095_MOESM1_ESM.pdf]
